# Supplementary material
Source: MDPI journal article supplement (https://www.mdpi.com/2073-445X/12/7/1372)
Supplement: s1 [file s1]

## Supplementary materials

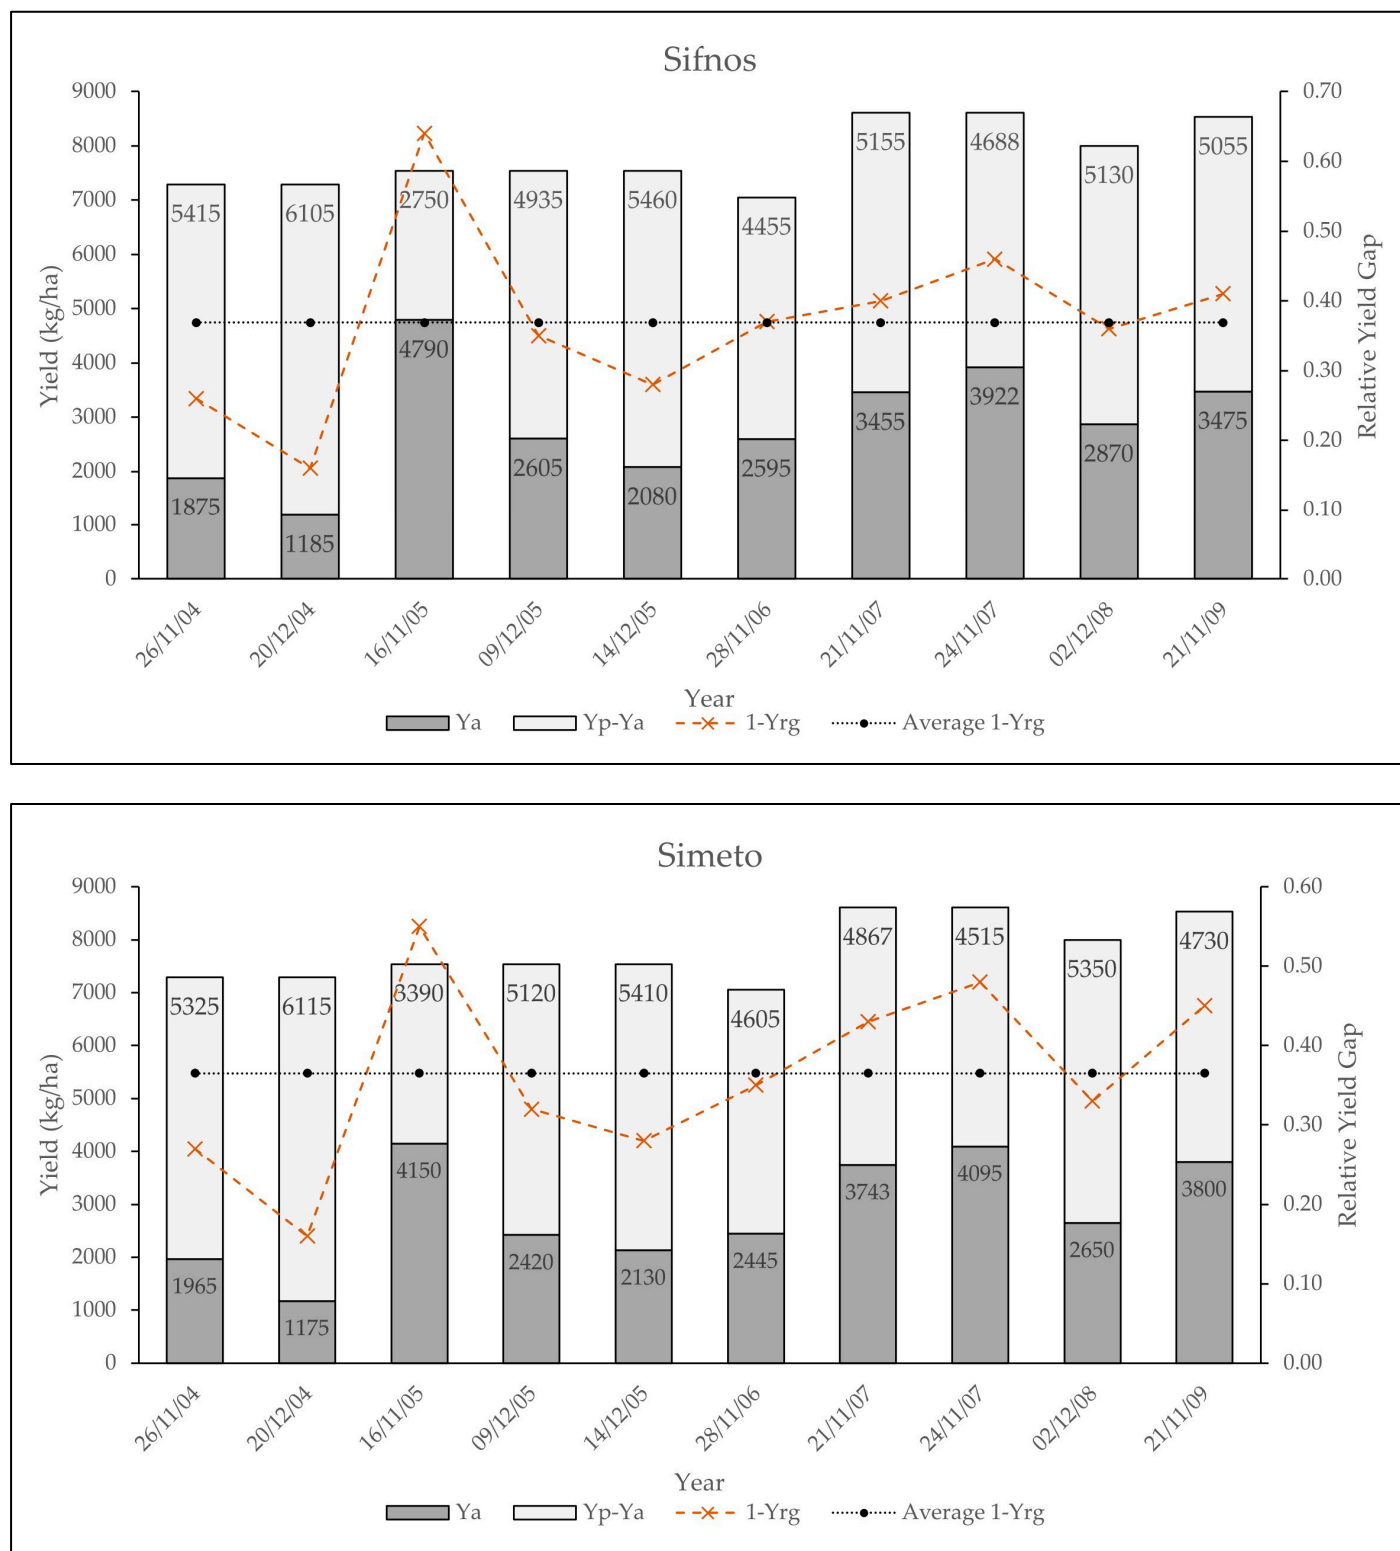

**Figure S1** Actual Yield (Ya) (kg dm/ha), Yield Gap (Yp-Ya) (kg dm/ha), relative Yield Gap (1-Yrg) and average relative Yield Gap for Sifnos and Simeto. Planting dates of the reported years are also shown on the horizontal axis.

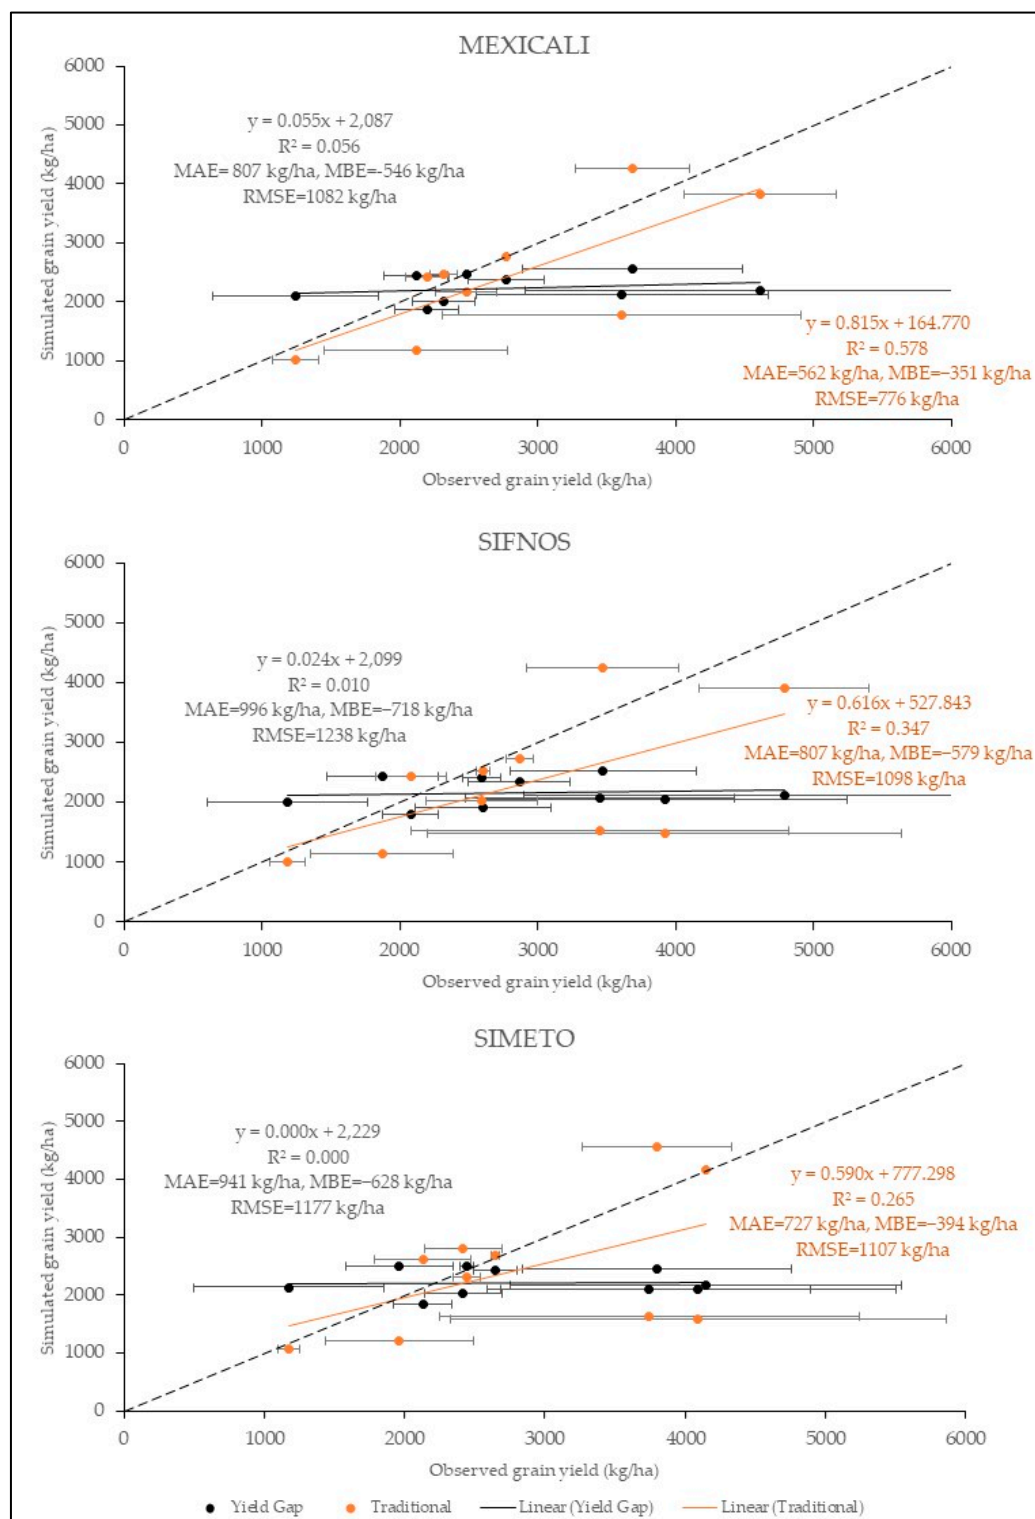

**Figure S2.** Comparison of the two calibration strategies (“Traditional (TrC)” vs “Yield gap (YgC\_unadj)”) grain yield for the three cultivars (Mexicali (n=9), Sifnos (n=10) and Simeto (n=10)). Bars indicate standard deviations of observations in relation to the average. The solid lines represent the linear regression fits to crop data, while the dotted line represents the 1:1 line.

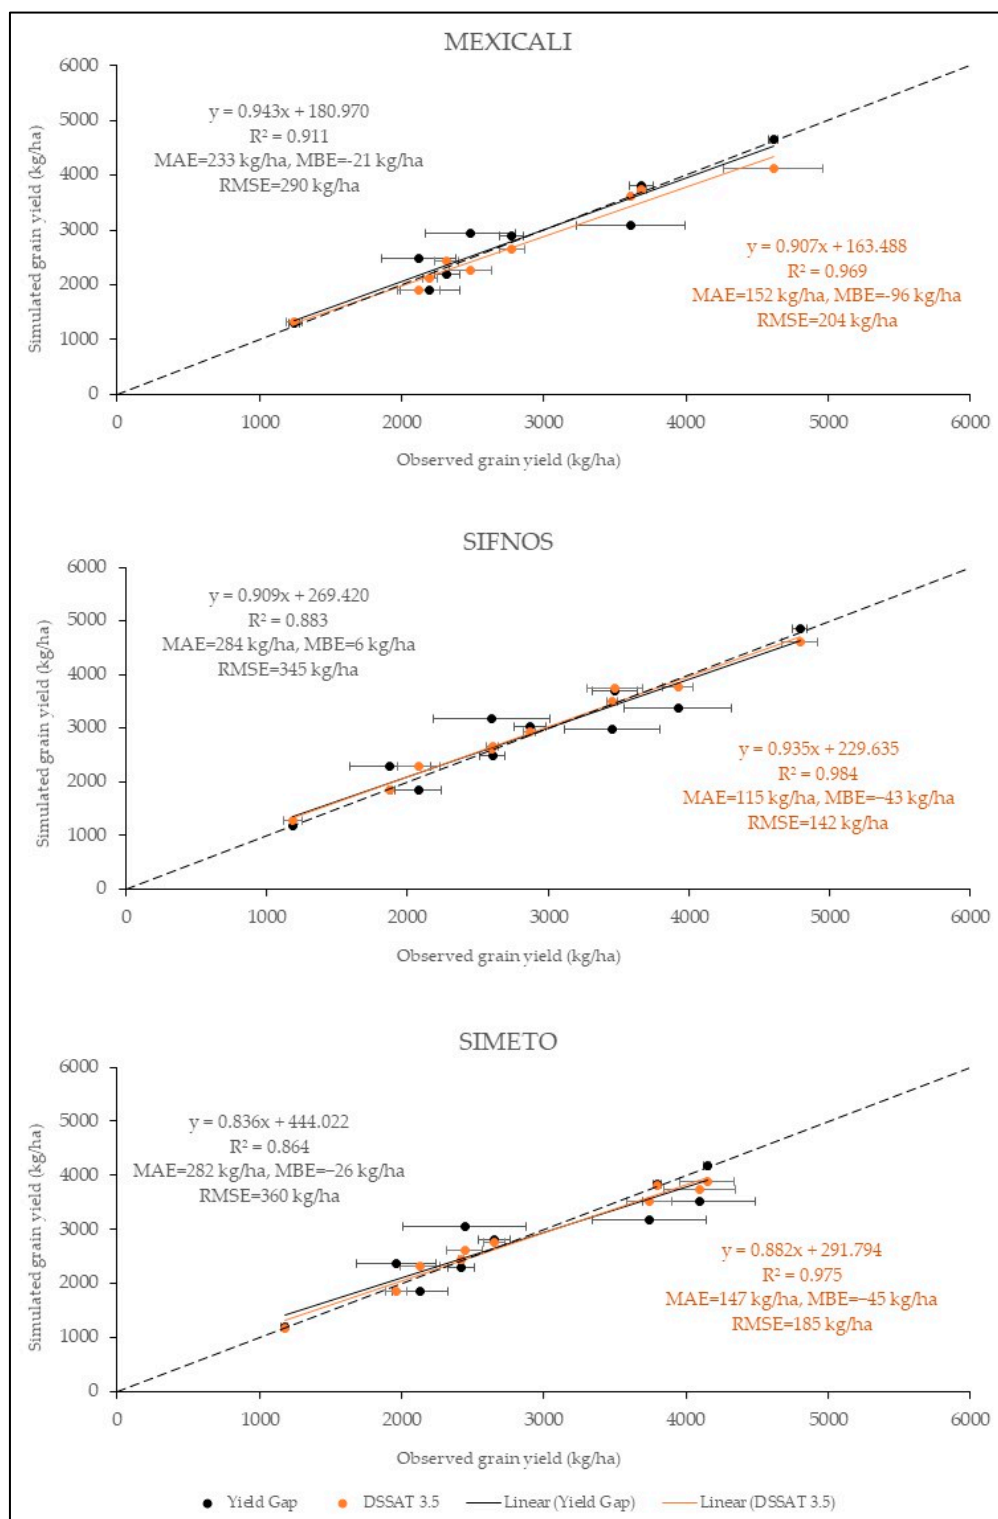

**Figure S3.** Comparison of the two calibration strategies (“DSSAT 3.5” vs “Yield gap (YgC\_unadj)”) grain yield for the three cultivars (Mexicali (n=9), Sifnos (n=10) and Simeto (n=10)). Bars indicate standard deviations of observations in relation to the average. The solid lines represent the linear regression fits to crop data, while the dotted line represents the 1:1 line.

**Table S1.** The EURO-CORDEX regional climate models whose simulations were used in the present study. The corresponding driving GCMs and the specific realizations are also shown.

|    | RCM           | Driving GCM                | Realization |
|----|---------------|----------------------------|-------------|
| 1  | ALADIN63.v2   | CNRM.CNRM-CERFACS-CNRM-CM5 | r1i1p1      |
| 2  | CCLM4-8-17.v1 | CLMcom.ICHEC-EC-EARTH      | r12i1p1     |
| 3  | HIRHAM5.v2    | DMI.ICHEC-EC-EARTH         | r3i1p1      |
| 4  | RACMO22E.v1   | KNMI.ICHEC-EC-EARTH        | r12i1p1     |
| 5  | RACMO22E.v2   | KNMI.MOHC-HadGEM2-ES       | r1i1p1      |
| 6  | RACMO22E.v2   | KNMI.CNRM-CERFACS-CNRM-CM5 | r1i1p1      |
| 7  | RCA4.v1       | SMHI.MOHC-HadGEM2-ES       | r1i1p1      |
| 8  | RCA4.v1       | SMHI.MPI-M-MPI-ESM-LR      | r1i1p1      |
| 9  | RCA4.v1       | SMHI.ICHEC-EC-EARTH        | r12i1p1     |
| 10 | REMO2009.v1   | MPI-CSC.MPI-M-MPI-ESM-LR   | r1i1p1      |
| 11 | REMO2009.v1   | MPI-CSC.MPI-M-MPI-ESM-LR   | r2i1p1      |

**Table S2.** Statistical indicators (correlation coefficient  $r$ , mean absolute error (MAE), mean bias (MBE), root mean squared error (RMSE) and the slope of the regression line (slope)) of the evaluation of CERES-Wheat results for anthesis and yield for the three cultivars with DSSAT 3.5 (Symeonidis, 2011). The same yield trials, with this study, were used.

### Anthesis

| DSSAT v3.5      |       |            |            |             |       |
|-----------------|-------|------------|------------|-------------|-------|
|                 | $R^2$ | MAE (days) | MBE (days) | RMSE (days) | slope |
| <b>Mexicali</b> | 0.95  | 2.11       | 1.22       | 3.38        | 0.71  |
| <b>Sifnos</b>   | 0.99  | 0.80       | 0.20       | 1.10        | 0.96  |
| <b>Simeto</b>   | 0.98  | 1.10       | 0.50       | 1.38        | 1.04  |

### Yield

| DSSAT v3.5      |       |             |             |              |       |
|-----------------|-------|-------------|-------------|--------------|-------|
|                 | $R^2$ | MAE (kg/ha) | MBE (kg/ha) | RMSE (kg/ha) | slope |
| <b>Mexicali</b> | 0.98  | 152         | -96         | 204          | 1.07  |
| <b>Sifnos</b>   | 0.99  | 115         | 43          | 142          | 1.05  |
| <b>Simeto</b>   | 0.99  | 147         | -45         | 185          | 1.11  |
